# Supplementary material
Source: Springer Nature journal article supplement (https://www.springermedizin.de/resource/supplementary/12884_2013_842_MOESM8_ESM.pdf/9458334)
Supplement: MOESM8 [file 9458334]

## Blog and discussion forum thread sources

| Blog title; post title                                                                                             | Posted             | URL                                                                                                                                                                                                                                                   |                                                                       |
|--------------------------------------------------------------------------------------------------------------------|--------------------|-------------------------------------------------------------------------------------------------------------------------------------------------------------------------------------------------------------------------------------------------------|-----------------------------------------------------------------------|
| <b>Baby Dust Diaries;</b> My Big Fat Preterm Labor, Pre-eclampsia, Gestational Diabetes Pregnancy Update           | Feb 2011           | <a href="http://babydustdiaries.com/2011/02/13/my-big-fat-preterm-labor-pre-eclampsia-gestational-diabetes-pregnancy-update/">http://babydustdiaries.com/2011/02/13/my-big-fat-preterm-labor-pre-eclampsia-gestational-diabetes-pregnancy-update/</a> |                                                                       |
| BIRD ON A LINE Trying, in my way, to be free; My Labor and Delivery Experience 6 Days Ago                          | Apr 2011           | <a href="http://www.bird-on-a-line.com/2011/04/my-labor-and-delivery-experience-6-days.html">http://www.bird-on-a-line.com/2011/04/my-labor-and-delivery-experience-6-days.html</a>                                                                   |                                                                       |
| Blessings in Disguise; Finally...26 Weeks!!                                                                        | Jul 2011           | <a href="http://bigbrotherx3.blogspot.com/2011/07/july-3-2011-finally26-weeks.html">http://bigbrotherx3.blogspot.com/2011/07/july-3-2011-finally26-weeks.html</a>                                                                                     |                                                                       |
| Butterflies and Rainbows. Remembering our butterfly baby, while hoping for our rainbow baby; Hospital admission #2 | Mar 2011           | <a href="http://butterflies-and-rainbows.blogspot.com/2011/03/hospital-admission-2.html">http://butterflies-and-rainbows.blogspot.com/2011/03/hospital-admission-2.html</a>                                                                           |                                                                       |
| DOUBLE THE TROUBLE, DOUBLE THE FUN; The down and dirty - My Labor and Birthing Story                               | Mar 2011           | <a href="http://ndsemanchik.blogspot.com/2011/03/down-and-dirty-my-labor-and-birthing.html">http://ndsemanchik.blogspot.com/2011/03/down-and-dirty-my-labor-and-birthing.html</a>                                                                     |                                                                       |
| Ebonyforever.com. Random Thoughts & Ramblings; Contractions?                                                       | Feb 2010           | <a href="http://www.ebonyforever.com/?p=48">http://www.ebonyforever.com/?p=48</a>                                                                                                                                                                     |                                                                       |
| Everyday Childhood with...Kelly Loubet; Pregnancy Hospitalizations: A Walk Down Memory Lane                        | May 2011           | <a href="http://everydaychildhood.com/2011/05/pregnancy-hospitalizations-a-walk-down-memory-lane/">http://everydaychildhood.com/2011/05/pregnancy-hospitalizations-a-walk-down-memory-lane/</a>                                                       |                                                                       |
| From the Heart; Part II: My C-Section Woes                                                                         | Jul 2011           | <a href="http://eafromtheheart.blogspot.com/2011/07/part-ii-my-c-section-woes.html">http://eafromtheheart.blogspot.com/2011/07/part-ii-my-c-section-woes.html</a>                                                                                     |                                                                       |
| Learning a new life; Contractions, Contractions, go away!                                                          | May 2011           | <a href="http://mamaoflydia.blogspot.com/2011/05/contractions-contractions-go-away.html">http://mamaoflydia.blogspot.com/2011/05/contractions-contractions-go-away.html</a>                                                                           |                                                                       |
| My Birth Class; Pregnancy# 1 Giana's Birth                                                                         | Jun 2011           | <a href="http://mybirthclass.blogspot.com/2011/06/pregnancy-1-gianas-birth.html">http://mybirthclass.blogspot.com/2011/06/pregnancy-1-gianas-birth.html</a>                                                                                           |                                                                       |
| Our Er-Lee Arrival (Preemie Mom); Magnesium Sulfate - A miracle drug, or perfectly legal torture? :-)              | Jun 2011           | <a href="http://ouerleearrivals.wordpress.com/2011/06/13/magnesium-sulfate-a-miracle-drug-or-perfectly-legal-torture/">http://ouerleearrivals.wordpress.com/2011/06/13/magnesium-sulfate-a-miracle-drug-or-perfectly-legal-torture/</a>               |                                                                       |
| OUR OWN KIND OF PERFECT; 154/106 And it went downhill from there...                                                | Feb 2010           | <a href="http://homykhappenings.blogspot.com/2010/04/154106.html">http://homykhappenings.blogspot.com/2010/04/154106.html</a>                                                                                                                         |                                                                       |
| Some Youngs; 5 Years                                                                                               | Apr 2011           | <a href="http://someyoungs.blogspot.com/2011/04/5-years.html">http://someyoungs.blogspot.com/2011/04/5-years.html</a>                                                                                                                                 |                                                                       |
| Steece's Pieces. Prayed for one, blessed with four!; Baby Week on DHC! The Birth Story of the Steece Quadruplets   | Jun 2009           | <a href="http://thelifeofsuz.blogspot.com/2009/06/baby-week-on-dhc-birth-story-of-steece.html">http://thelifeofsuz.blogspot.com/2009/06/baby-week-on-dhc-birth-story-of-steece.html</a>                                                               |                                                                       |
| The Birth Teacher. Informed choices. Positive births.; Preterm labor                                               | Mar 2009           | <a href="http://thebirthteacher.blogspot.com/2009/03/preterm-labor.html">http://thebirthteacher.blogspot.com/2009/03/preterm-labor.html</a>                                                                                                           |                                                                       |
| The Morris Family. Life is Beautiful; Magnesium Sulfate                                                            | Apr 2008           | <a href="http://themorrisfamily-blog.blogspot.com/2008/04/magnesium-sulfate.html">http://themorrisfamily-blog.blogspot.com/2008/04/magnesium-sulfate.html</a>                                                                                         |                                                                       |
| The Pajama Mama; Birth Story Aftermath: Re-Hospitalization                                                         | Mar 2011           | <a href="http://thepajamamama.wordpress.com/2011/03/16/birth-story-aftermath-re-hospitalization/">http://thepajamamama.wordpress.com/2011/03/16/birth-story-aftermath-re-hospitalization/</a>                                                         |                                                                       |
| This Crazy Life; Pre-eclampsia. May is Preeclampsia Month                                                          | May 2011           | <a href="http://thiscrazylife-amy.blogspot.com/2011/05/pre-eclampsia.html">http://thiscrazylife-amy.blogspot.com/2011/05/pre-eclampsia.html</a>                                                                                                       |                                                                       |
| Twin Talk; Preterm labor. Preeclampsia?                                                                            | Feb 2010           | <a href="http://www.twin-talk.com/2010/02/preeclampsia.html">http://www.twin-talk.com/2010/02/preeclampsia.html</a>                                                                                                                                   |                                                                       |
| Writing Roads. Write where you want to go; Tomato soup of the leg                                                  | Sept 2010          | <a href="http://writingroads.com/blog/2010/09/tomato-soup-of-the-leg/">http://writingroads.com/blog/2010/09/tomato-soup-of-the-leg/</a>                                                                                                               |                                                                       |
| Discussion forum or group; thread                                                                                  | Dated              | URL                                                                                                                                                                                                                                                   |                                                                       |
| pPROM Support Group; Magnesium Sulfate                                                                             | Jul 2010           | <a href="http://community.babycenter.com/">http://community.babycenter.com/</a>                                                                                                                                                                       |                                                                       |
| April 2010 Birth Club; Magnesium Sulfate                                                                           | Mar 2010           |                                                                                                                                                                                                                                                       |                                                                       |
| Bedrest Club; Magnesium sulfate long term                                                                          | Nov - Dec 2010     |                                                                                                                                                                                                                                                       |                                                                       |
| Large Families; Magnesium Sulfate - any experiences?                                                               | Feb 2011           |                                                                                                                                                                                                                                                       |                                                                       |
| November 2009 Turkey Babies EDD 11/21-11/30; Magnesium Sulfate during labor for pre-eclampsia?                     | Oct 2009           |                                                                                                                                                                                                                                                       |                                                                       |
| Pregnancy Issues; Magnesium sulfate treatment and pre-term labour???                                               | Apr - year unknown |                                                                                                                                                                                                                                                       | <a href="http://forum.baby-gaga.com/">http://forum.baby-gaga.com/</a> |
| Pregnancy Issues; magnesium sulfate??                                                                              | Mar - Apr 2009     |                                                                                                                                                                                                                                                       |                                                                       |
| Pregnancy Issues; Moms who have been on Magnesium Sulfate?                                                         | Aug 2009           |                                                                                                                                                                                                                                                       |                                                                       |
| Pregnancy Issues; Magnesium Sulfate Question.                                                                      | Sept 2010          |                                                                                                                                                                                                                                                       |                                                                       |
| Labor and Birth; Magnesium for stopping labor                                                                      | Jan 2010           |                                                                                                                                                                                                                                                       |                                                                       |
| Fit Moms Pregnancy and Postpartum; Breast milk and magnesium sulfate?                                              | Jun 2008           | <a href="http://cathe.com/forum/">http://cathe.com/forum/</a>                                                                                                                                                                                         |                                                                       |
| Pregnancy Support Group; Should I refuse magnesium sulfate?                                                        | Nov 2007           | <a href="http://www.dailystrength.org/c/Pregnancy/forum">http://www.dailystrength.org/c/Pregnancy/forum</a>                                                                                                                                           |                                                                       |
| Pregnancy Support Group; Magnesium                                                                                 | Nov 2008           |                                                                                                                                                                                                                                                       |                                                                       |

|                                                                                                                              |                    |                                                                                               |
|------------------------------------------------------------------------------------------------------------------------------|--------------------|-----------------------------------------------------------------------------------------------|
| Expectant Moms; Experience w/ magnesium sulfate?                                                                             | Mar 2010           | <a href="http://www.dcurbanmom.com/">http://www.dcurbanmom.com/</a>                           |
| Expectant Moms; blood pressure inconsistency at Doctor's office - no other pre-e symptoms                                    | Jul 2009           |                                                                                               |
| Expectant Moms; Preeclampsia                                                                                                 | Sept 2010          |                                                                                               |
| Expectant Moms; Induction for signs of preeclampsia at 37.5 weeks?                                                           | Mar 2010           |                                                                                               |
| Expectant Moms; high blood pressure - how bad is this news?                                                                  | Aug 2011           |                                                                                               |
| Babies and Kids With Disabilities & Special Needs; Preeclampsia Second Pregnancy                                             | Sept 2010          | <a href="http://www.essentialbaby.com.au/forums/">http://www.essentialbaby.com.au/forums/</a> |
| Babies Born Early (and beyond); Has anyone been given magnesium Sulfate therapy?                                             | Jan 2008           |                                                                                               |
| Pregnancy: Tips, Questions and Information; Eclampsia - study has found...Epsom salts could halve the risk of developing it! | Aug 2010           |                                                                                               |
| Specialised Pregnancy Support Groups; Pre-Eclampsia Support BG - #11                                                         | Jul 2008           |                                                                                               |
| Babies Born Early (and beyond); Mag Sulfate???                                                                               | Mar 2005           |                                                                                               |
| Breastfeeding Support: Ask the Lactation Consultant; Magnesium sulfate...anyone BTDT? (long)                                 | Aug 2005           | <a href="http://forums.ivillage.com/">http://forums.ivillage.com/</a>                         |
| High Risk & Pregnancy Complications; magnesium sulfate                                                                       | Apr 2003           |                                                                                               |
| April 2007 Expecting Club; Magnesium sulfate - preterm labor - ??                                                            | Jan 2007           |                                                                                               |
| May 2008 Expecting Club; Anyone have magnesium sulfate?                                                                      | May 2008           |                                                                                               |
| January 2006 Expecting Club; Premie BTDT? Magnesium? very scared!                                                            | Mar 2005           |                                                                                               |
| Pregnancy; pre eclampsia with 1st baby                                                                                       | Jan 2006           | <a href="http://www.mumsnet.com/">http://www.mumsnet.com/</a>                                 |
| Labor; Please pray for us *update*                                                                                           | Jul - year unknown | <a href="http://www.pregnancythisweek.com/">http://www.pregnancythisweek.com/</a>             |
| Pregnant; Preterm labor                                                                                                      | Jul - year unknown |                                                                                               |
| High risk pregnancy; Im in labor at 27 weeks :(                                                                              | Jul - year unknown |                                                                                               |
| High risk pregnancy; So scared...21 weeks in l&d update #2 update #3                                                         | Aug - year unknown |                                                                                               |
| May 2011 Babies; Magnesium Sulfate                                                                                           | Apr 2011           | <a href="http://www.whattoexpect.com/">http://www.whattoexpect.com/</a>                       |
| July 2011 Babies; magnesium sulfate sucks!                                                                                   | May 2011           |                                                                                               |
| Multiples and Twins; magnesium sulfate                                                                                       | Dec - year unknown |                                                                                               |
| April 2011 Babies; Joined the magnesium sulfate club...                                                                      | Feb 2011           |                                                                                               |
| August 2011 Babies; went to the doctor and the doctor said                                                                   | Feb 2011           |                                                                                               |
